# Supplementary material for: A self-cascade system based on Ag nanoparticle/single-walled carbon nanotube nanocomposites as an enzyme mimic for ultrasensitive detection of l-cysteine
Source: Royal Society of Chemistry journal article supplement (doi:10.1039/d3ay00445g), 2023-01-01
Supplement: d3ay00445g1.pdf [file d3ay00445g1.pdf]

## Supporting information

### Self-cascade system based on Ag nanoparticles/single-walled carbon nanotubes nanocomposites as mimic enzyme for ultrasensitive detection of L-cysteine

Feifei Li,<sup>1,2 ‡</sup> Congcong Hu,<sup>1 ‡</sup> Wenen Su,<sup>1</sup> Hao Liang,<sup>1</sup> Fubing Xiao,<sup>1</sup> Jinqian Liu,<sup>1</sup>

Yan Tan,<sup>1</sup> Shengyuan Yang<sup>1\*</sup>

1 Department of public health laboratory sciences, School of Public Health, Hengyang Medical School, University of South China, Hengyang, Hunan, 421001, China.

2 Department of Endocrinology, Union Hospital, Tongji Medical College, Huazhong University of Science and Technology, Wuhan, 430022, China.

\*Corresponding author: E-mail: yangshyhy@126.com

‡ Both authors contributed equally to this work.

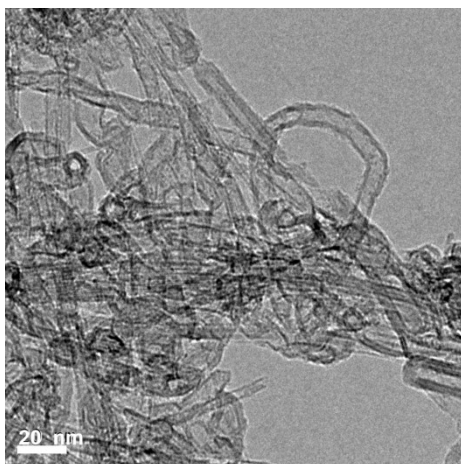

Fig. S1 Transmission electron microscopic (TEM) images of SWCNTs.

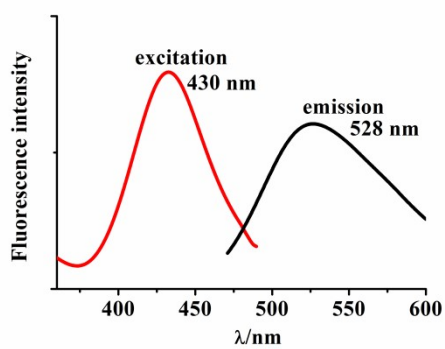

Fig. S2 Fluorescence spectra of DNA-Ag NCs.

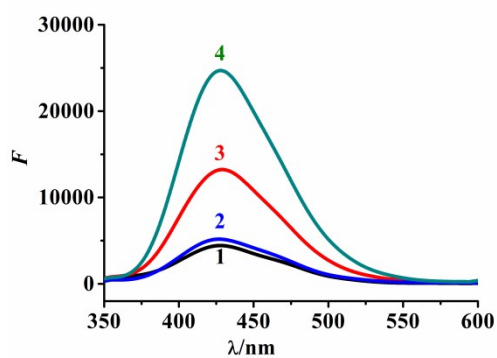

Fig. S3 Fluorescence spectra of (1) TA+H<sub>2</sub>O<sub>2</sub>, (2) TA+H<sub>2</sub>O<sub>2</sub>+AgNP/SWCNTs, (3) TA+H<sub>2</sub>O<sub>2</sub>+Fe<sup>2+</sup>, and (4) TA+H<sub>2</sub>O<sub>2</sub>+AgNP/SWCNTs+Fe<sup>2+</sup>.

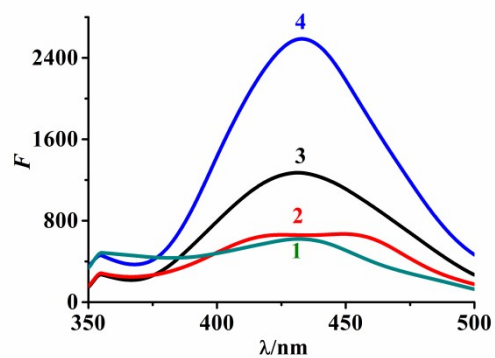

Fig. S4 Fluorescence spectra of TA-L-cysteine system with (1) and without (2) nitrogen gas blowing, and TA+ L-cysteine + AgNP/SWCNTs system with (3) and without (4) nitrogen gas blowing.

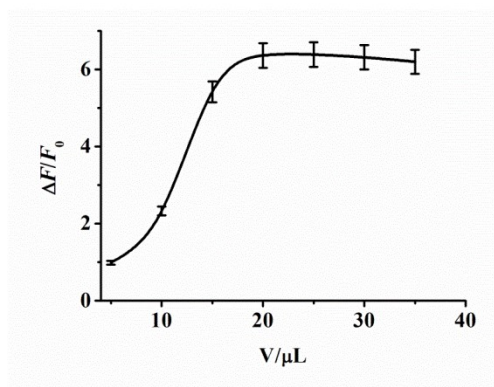

Fig. S5 The effect of the DNA-Ag NCs volume on our system.

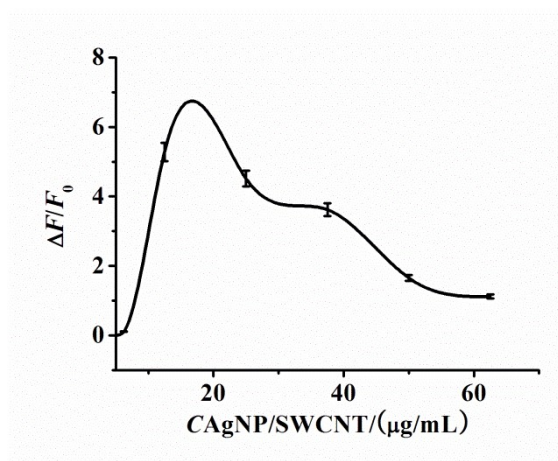

Fig. S6 The effect of the concentration of AgNP/SWCNTs on our system: the reaction was measured under different concentrations of AgNP/SWCNTs.

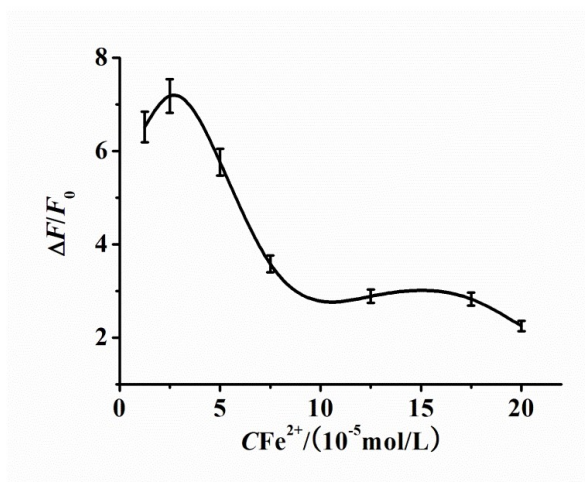

Fig. S7 The effect of the concentration of  $\text{Fe}^{2+}$  on our system: the reaction was measured under different concentrations of  $\text{Fe}^{2+}$ .

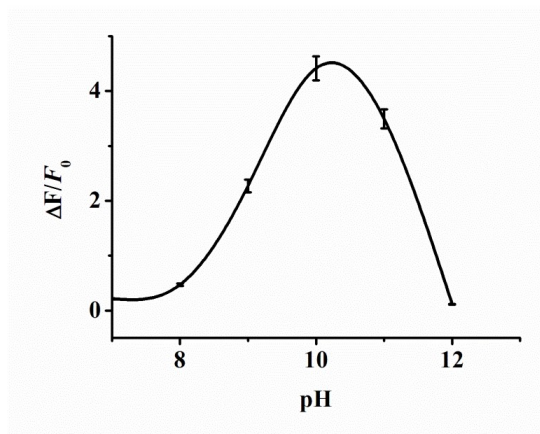

Fig. S8 The effect of pH on our system: the reaction was measured under different pH conditions.

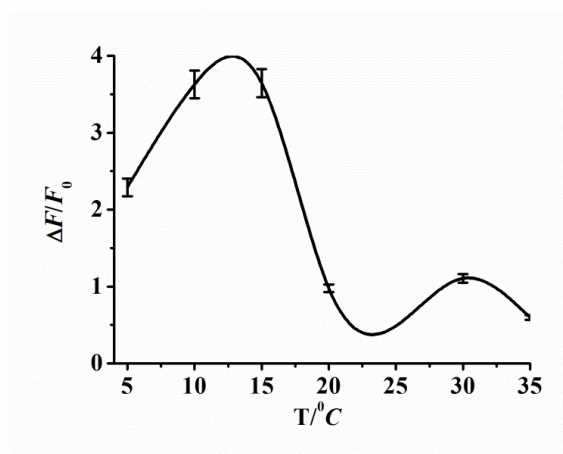

Fig. S9 The effect of temperature on our system: the reaction was measured under temperature conditions.

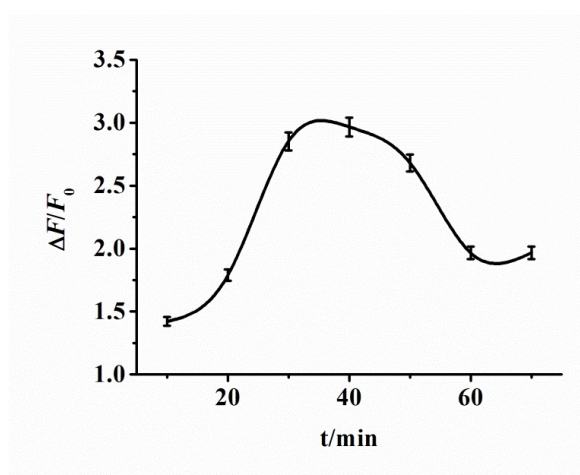

Fig. S10 The effect of incubation time on our system: the reaction was measured under different incubation times conditions.

Table S1 Reported detection limits of L-cysteine in different methods.

| Detection probes  | Read out        | Linear range( $\mu\text{M}$ )               | LOD( $\mu\text{M}$ )  | Ref       |
|-------------------|-----------------|---------------------------------------------|-----------------------|-----------|
| CuO NPs-TA        | fluorescence    | 0.6-100                                     | $6.6 \times 10^{-3}$  | [16]      |
| AuNCs-AuNPs       | fluorescence    | 1.5-35.0                                    | 1.4                   | [25]      |
| Si-CDs            | fluorescence    | 20-100                                      | 0.41                  | [26]      |
| Fe-CDs-OPD        | fluorescence    | 0.25-90                                     | 0.047                 | [27]      |
| Cu-MOG            | electrochemical | 0.1-6                                       | 0.04                  | [28]      |
| rGO-GP-TMB        | colorimetric    | 2-30                                        | 0.1                   | [29]      |
| ILs-AgNPs         | colorimetric    | 0.082- 0.826                                | $4.0 \times 10^{-3}$  | [30]      |
| AgNP/SWCNTs-AgNCs | fluorescence    | $0.8 \times 10^{-3}$ - $1.0 \times 10^{-3}$ | $0.22 \times 10^{-3}$ | This work |

[25] X. F. Li, J. Qiao, Z. W. Li, L. Qi, *Analyst.*, 2020, **145**, 2233-2237.

[26] M. H. Zan, C. Li, D. M. Zhu, L. Rao, Q. F. Meng, B. Chen, W. Xie, X. W. Qie, L. Li, X. J. Zeng, Y. R. Li, W. F. Dong, W. Liu, *J. Mater. Chem. B.*, 2020, **8**, 919-927.

[27] C. F. Lu, Y. Liu, Q. Wen, Y. Liu, Y. Y. Wang, H. B. Rao, Z. Shan, W. Zhang, X. X. Wang, 2020, **31**, 445703.

[28] C. P. Yang, Q. Wu, Z. W. Jiang, X. Wang, C. Z. Huang, Y. F. Li, *Talanta*, 2021, **228**, 122261.

- [29] C. Liu, Y. M. Zhao, D. Xu, X. X. Zheng, Q. Huang, *Anal. Bioanal. Chem.*, 2021, 413, 4013-4022.
- [30] S. Sahu, S. Sharma, T. Kan, K. Shrivastava, K. K. Ghosh, *Spectrochim. Acta A Mol. Biomol. Spectrosc.*, **246**, 118961.
